# Supplementary material for: Dual amplification strategy turns TRPM2 channels into supersensitive central heat detectors
Source: PubMed Central journal article supplement — Proc Natl Acad Sci U S A. 2022 Nov 21;119(48):e2212378119. doi: 10.1073/pnas.2212378119 (PMC9881722; doi:10.1073/pnas.2212378119), 2022-11-21
Supplement: pnas.2212378119.sapp.pdf [file pnas.2212378119.sapp.pdf]

## **Supporting Information for** Dual amplification strategy turns TRPM2 channels into supersensitive central heat detectors

Ádám Bartók<sup>1,2,3</sup> and László Csanády<sup>1,2,3</sup>

<sup>1</sup>HCEMM-SE Molecular Channelopathies Research Group,

<sup>2</sup>MTA-SE Ion Channel Research Group,

<sup>3</sup>Department of Biochemistry

Semmelweis University, Tuzolto u. 37-47, Budapest, H-1094, Hungary

Corresponding author: László Csanády

Email: csanady.laszlo@med.semmelweis-univ.hu

### **This PDF file includes:**

SI Materials and methods  
Figures S1 to S5  
Table S1  
Legend for Movie S1

### **Other supporting materials for this manuscript include the following:**

Movie S1

## Supporting Information Text

### SI Materials and methods

**Measuring temperature dependence of Ca-gluconate  $K_d$ , calibration of free  $[Ca^{2+}]$  at each temperature.** Free  $[Ca^{2+}]$  in the micromolar range was determined as described (12). Ca-Green 5N (Invitrogen) fluorescence (excitation, 505 nm; emission, 535 nm) was measured in a cuvette-based fluorimeter (DeltaRAM, Photon Technology Industries). Apparent binding parameters ( $K_d$ ,  $n$ ) of the dye at 25, 30, 37 and 40°C and pH 7.1 were first obtained by stepwise titration with  $CaCl_2$  in a solution initially containing 100 mM KCl, 2 mM  $MgCl_2$ , 10 mM HEPES and 1  $\mu M$  Ca-Green 5N at each test temperature, followed by fitting plots of  $(F-F_{min})/(F_{max}-F)$  vs.  $[Ca^{2+}]$  with the function  $y=(x/K_d)^n$  (Fig. S5A-C). Using the determined dye parameters free  $[Ca^{2+}]$  could be accurately predicted in the range of 2-100  $\mu M$  (Fig. S5D).

In electrophysiological experiments  $Ca^{2+}$  concentrations in the micromolar range were buffered using 144 mM gluconate. Temperature dependence of  $K_d$  of Ca-gluconate was determined as described (1) by stepwise titration, at each temperature, of our standard bath solution (144 mM Na-gluconate, 2 mM Mg-gluconate<sub>2</sub>, 10 mM HEPES, pH=7.1) with  $CaCl_2$ ; plots of free  $[Ca^{2+}]$  vs. added  $[Ca^{2+}]$  (Fig. S5F) were fitted to a simple binding equation with  $K_d$  and total background  $[Ca^{2+}]$  as the free parameters. The obtained, temperature-adjusted  $K_d$  of Ca-gluconate (Fig. S5F) and the obtained total background  $Ca^{2+}$  (~17  $\mu M$ ) were used to calculate, at each temperature, free  $[Ca^{2+}]$  following addition of various concentrations of Ca-gluconate<sub>2</sub> to the standard bath solution (summarized in Table S1).

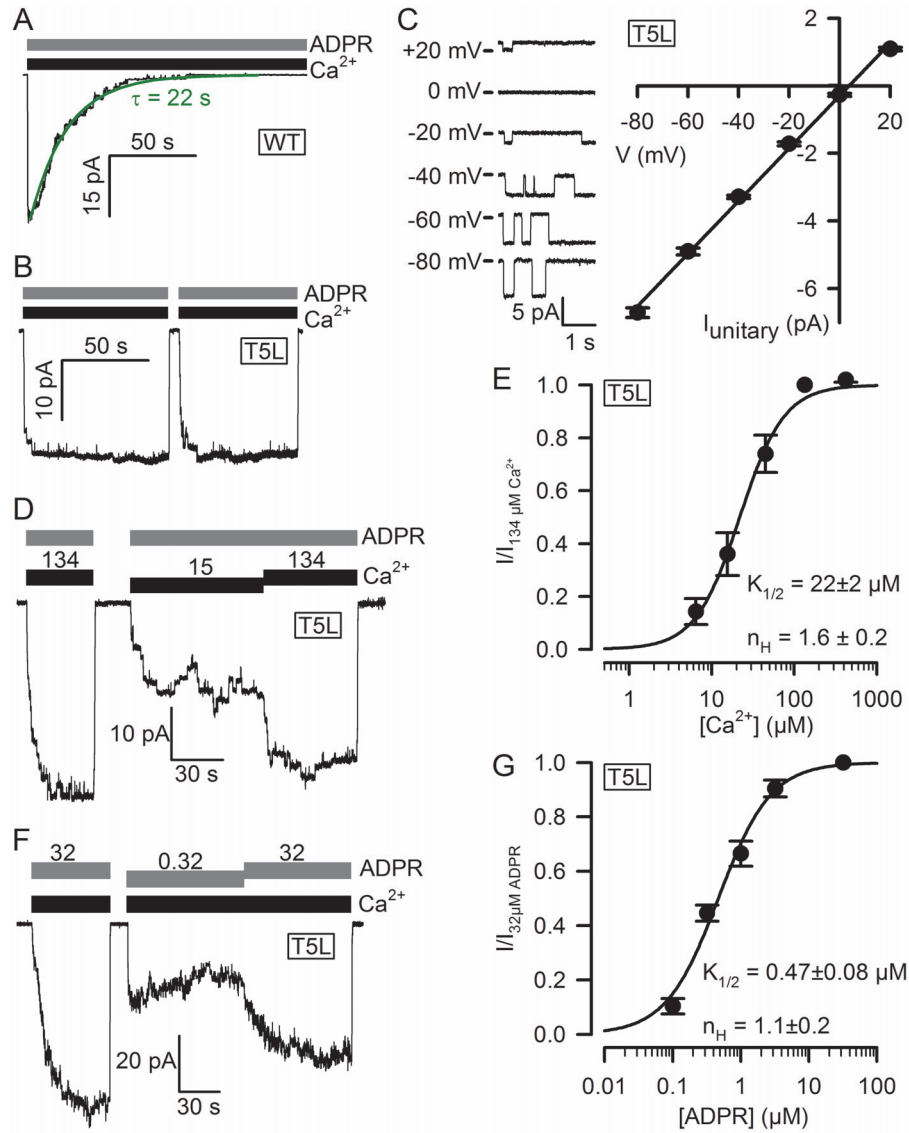

**Fig. S1. Basic biophysical properties of TRPM2 channels in HEK-293 cell membranes resemble those reported for TRPM2 in *Xenopus laevis* oocyte membranes.** A-B, Quasi-macroscopic inward currents of WT (A) and T5L (B) TRPM2 channels in inside-out patches at 25°C, activated by 134  $\mu\text{M}$   $\text{Ca}^{2+}$  (black bars) + 32  $\mu\text{M}$  ADPR (gray bars). Membrane potential ( $V_m$ ) was -20 mV. Inactivation time course in A is fitted by a single exponential (green curve). C, Unitary openings at various voltages (left) and unitary current-voltage relationship (right) of T5L TRPM2 in symmetrical 140 mM  $\text{Na}^+$  at 25°C; the slope of the linear regression fit (black line) is  $78 \pm 2$  pS. D, F, T5L TRPM2 currents evoked by (D) 32  $\mu\text{M}$  ADPR (gray bars) and various concentrations of  $\text{Ca}^{2+}$  (black bars,  $[\text{Ca}^{2+}]$  in  $\mu\text{M}$ ), or (F) 134  $\mu\text{M}$   $\text{Ca}^{2+}$  (black bars) and various concentrations of ADPR (gray bars,  $[\text{ADPR}]$  in  $\mu\text{M}$ ).  $V_m$  was -20 mV. E, G, Dose response curves of macroscopic T5L TRPM2 currents for (E)  $\text{Ca}^{2+}$  and (G) ADPR, with the other ligand kept saturated. Currents were normalized to the mean of the currents observed during bracketing exposures to 134  $\mu\text{M}$   $\text{Ca}^{2+}$  + 32  $\mu\text{M}$  ADPR in the same patch. Data in C, E, G represent mean  $\pm$  SEM,  $n=3$  (C), 6-7 (E), 15-21 (G). Curves are fits to the Hill equation with fit parameters plotted in the panels. Obtained parameters closely resemble those reported for T5L TRPM2 studied in *Xenopus laevis* oocyte membranes (2).

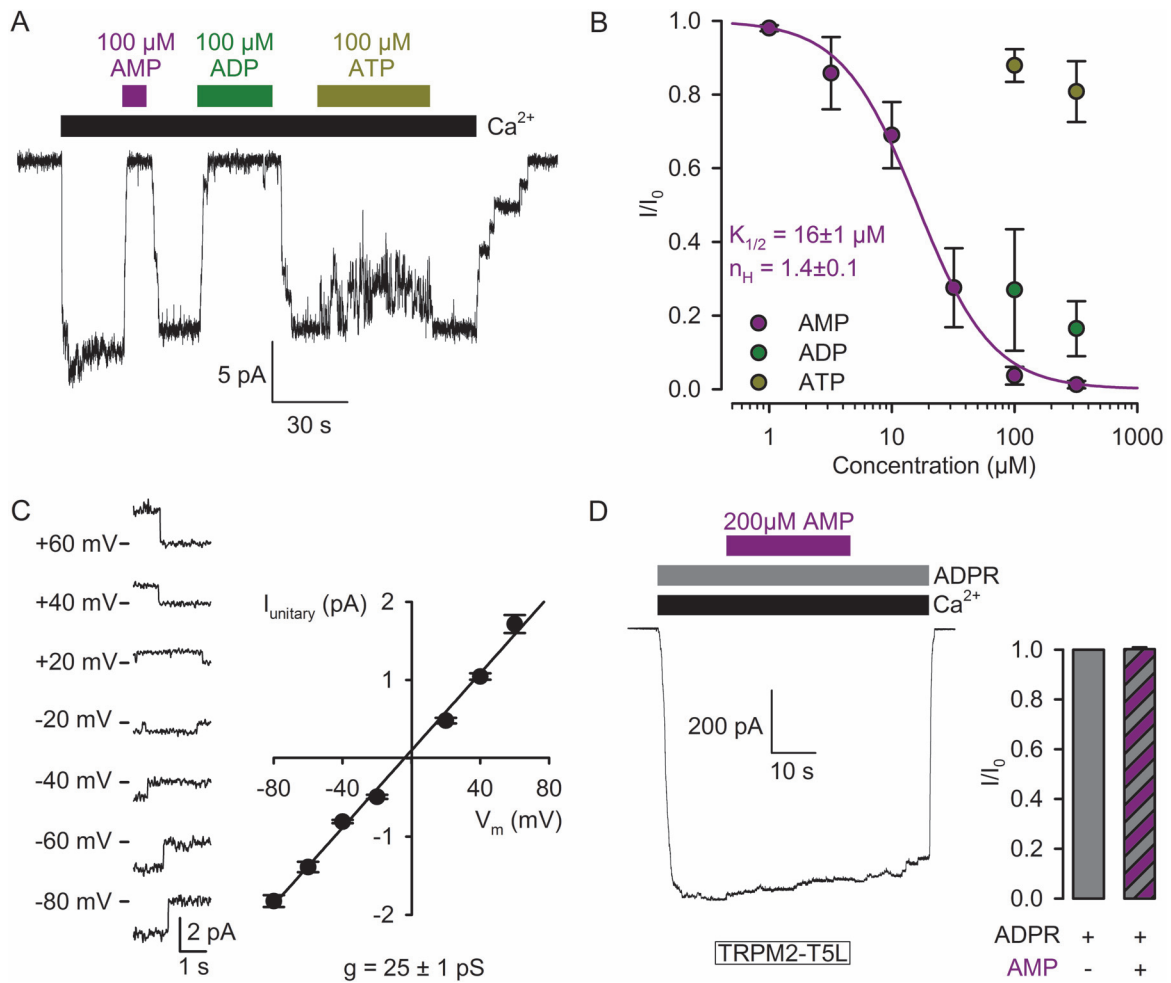

**Fig. S2. Endogenous TRPM4-like channels, but not TRPM2, are blocked by cytosolic AMP.**

**A**, Exposure to cytosolic Ca<sup>2+</sup> (134  $\mu\text{M}$ ) activates endogenous cation channels in an inside-out patch from an untransfected HEK-293T cell. The currents are inhibited by cytosolic exposure to AMP, ADP, and ATP (colored bars). **B**, Dose response curves of inhibition by AMP (purple), ADP (green) and ATP (gold) of the endogenous current. Currents were normalized to the mean of the currents observed during bracketing exposures to 134  $\mu\text{M}$  Ca<sup>2+</sup> alone in the same patch. Purple curve is a fit of the AMP data to the Hill equation with fit parameters plotted. **C**, Unitary openings at various voltages (left) and unitary current-voltage relationship (right) of the endogenous channels in symmetrical 140 mM Na<sup>+</sup>; the slope of the linear regression fit (black line) is 25 $\pm$ 1 pS. **D**, (Left) Large macroscopic T5L TRPM2 current in inside-out patch from a transfected HEK-293T cell, evoked by exposure to 134  $\mu\text{M}$  Ca<sup>2+</sup> + 32  $\mu\text{M}$  ADPR with or without 200  $\mu\text{M}$  AMP (purple bar). (Right) Fractional effect of 200  $\mu\text{M}$  cytosolic AMP on TRPM2 currents (striped bar). In **A**, **D**,  $V_m = -20 \text{ mV}$ . Temperature is 25°C. Data in **B**, **C**, **D** represent mean $\pm$ SEM,  $n = 4-8$  (**B**, AMP), 3-5 (**B**, ADP), 4-5 (**B**, ATP), 3 (**C**), 7 (**D**).

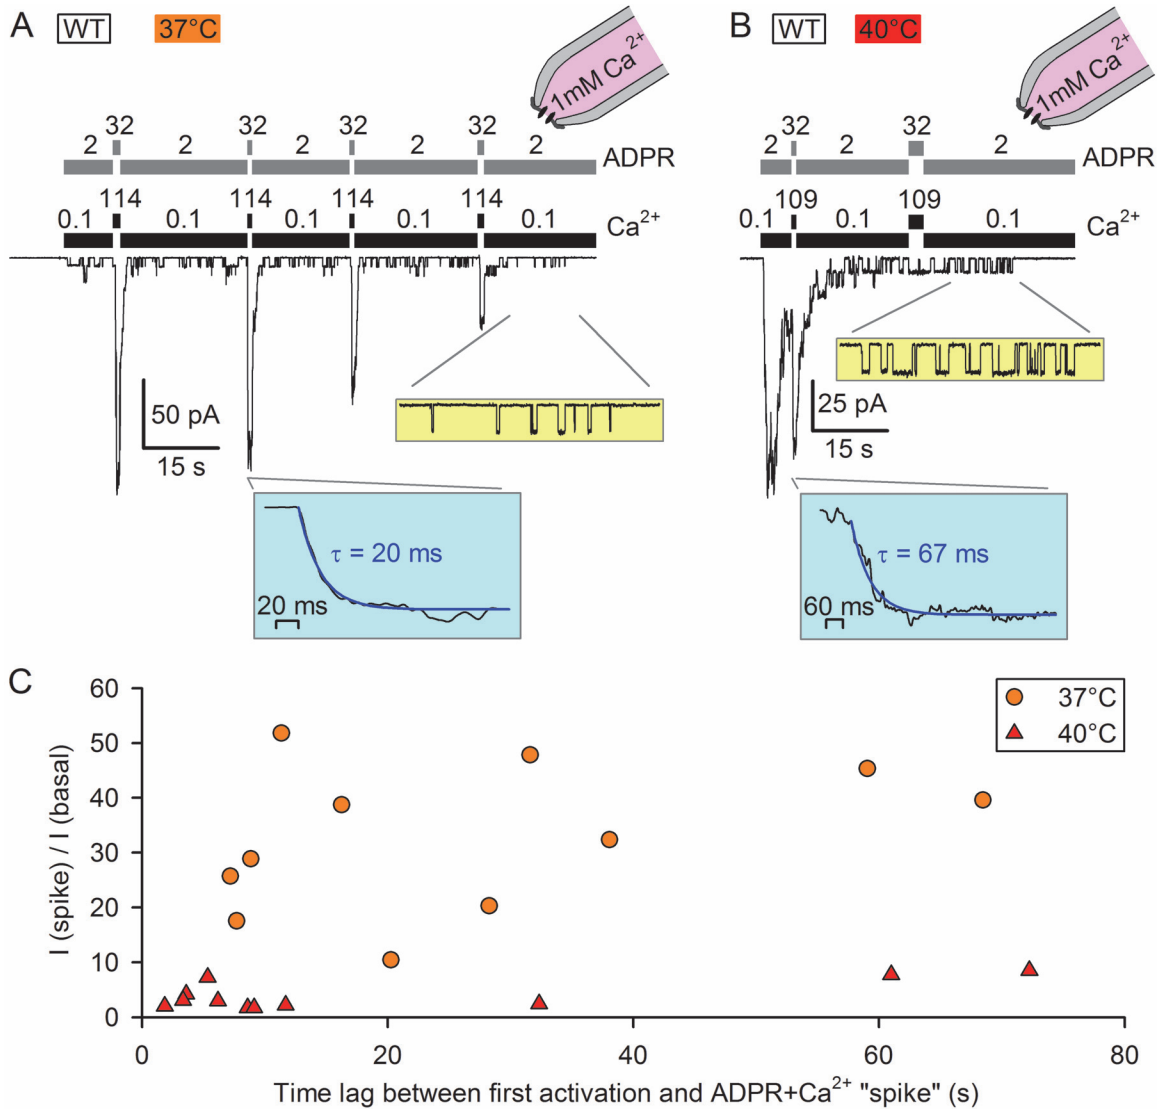

**Fig. S3. Fractional stimulation of WT TRPM2 by agonist spiking is invariant to current rundown.** A-B, Transient activation of macroscopic inside-out patch currents of WT TRPM2 channels at 37°C (A) and 40°C (B) by cytosolic superfusion with 0.1  $\mu\text{M}$  Ca<sup>2+</sup> + 2  $\mu\text{M}$  ADPR, with ~1 mM free Ca<sup>2+</sup> present in the extracellular (pipette) solution. Cytosolic agonist concentrations were repeatedly briefly (for ~1-2 s) raised to saturating levels (concentrations indicated above bars; in  $\mu\text{M}$ ).  $V_m$  was -80 mV. Cyan insets illustrate relaxation time courses during agonist spiking, with time constants comparable to that of solution exchange. Yellow insets illustrate gating patterns of last surviving channels. C, Fractional current responses to brief agonist "spiking" at 37°C (orange circles) and 40°C (red triangles) plotted as a function of the time lag between initial channel activation (by exposure to 0.1  $\mu\text{M}$  Ca<sup>2+</sup> + 2  $\mu\text{M}$  ADPR) and the subsequent high-agonist "spike".

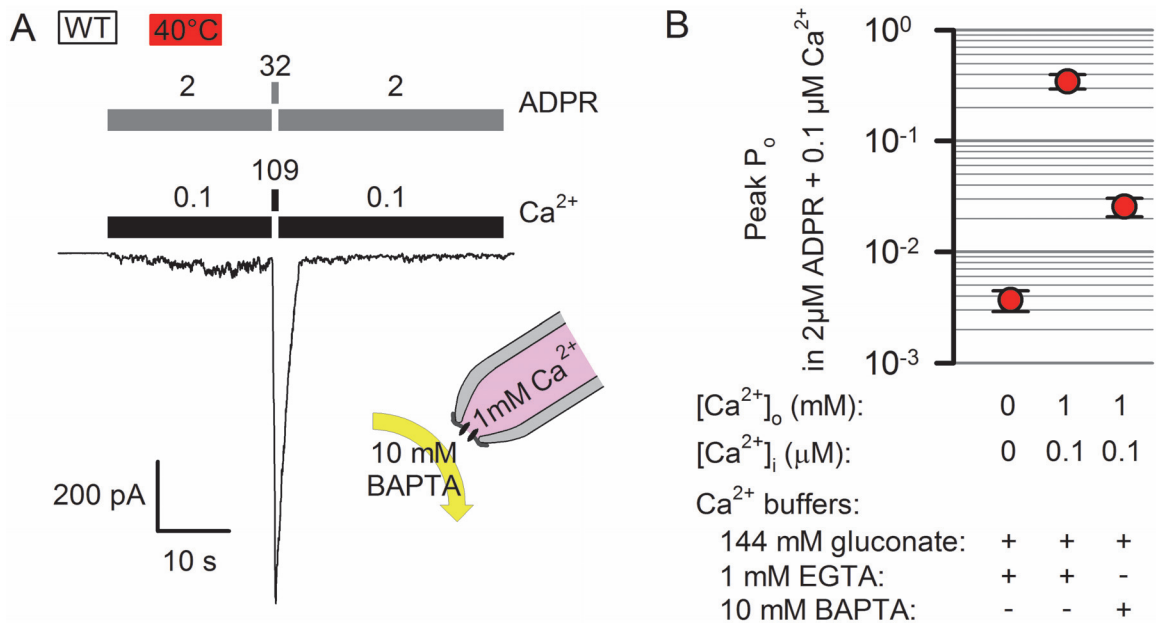

**Fig. S4. Excessive cytosolic  $\text{Ca}^{2+}$  buffering blunts stimulation of WT TRPM2 channels by  $\text{Ca}^{2+}$  influx.** *A*, Transient activation of macroscopic inside-out patch current of WT TRPM2 channels at 40°C by cytosolic superfusion with 0.1  $\mu\text{M}$   $\text{Ca}^{2+}$  + 2  $\mu\text{M}$  ADPR, with ~1 mM free  $\text{Ca}^{2+}$  present in the extracellular (pipette) solution. Cytosolic  $[\text{Ca}^{2+}]$  was buffered using 10 mM BAPTA. Cytosolic agonist concentrations were briefly (for ~1.5 s) raised to saturating levels (concentrations indicated above bars; in  $\mu\text{M}$ ).  $V_m$  was -80 mV. *B*, Comparison of estimated  $P_o$  (mean $\pm$ SEM) of TRPM2 channels at 40°C under the following three conditions: (*Left*) 2  $\mu\text{M}$  extracellular  $\text{Ca}^{2+}$ , cytosolic 4 nM  $\text{Ca}^{2+}$  (1 mM EGTA) + 32  $\mu\text{M}$  ADPR (T5L, replotted from Fig. 1C); (*Center*) 1 mM extracellular  $\text{Ca}^{2+}$ , cytosolic 100 nM  $\text{Ca}^{2+}$  (1 mM EGTA) + 2  $\mu\text{M}$  ADPR (WT, replotted from Fig. 5E); (*Right*) 1 mM extracellular  $\text{Ca}^{2+}$ , cytosolic 100 nM  $\text{Ca}^{2+}$  (10 mM BAPTA) + 2  $\mu\text{M}$  ADPR (WT, from panel A, n=11). For the latter condition estimated (using Eq. 1) free  $[\text{Ca}^{2+}]$  around the activating sites is 1.2  $\mu\text{M}$ .

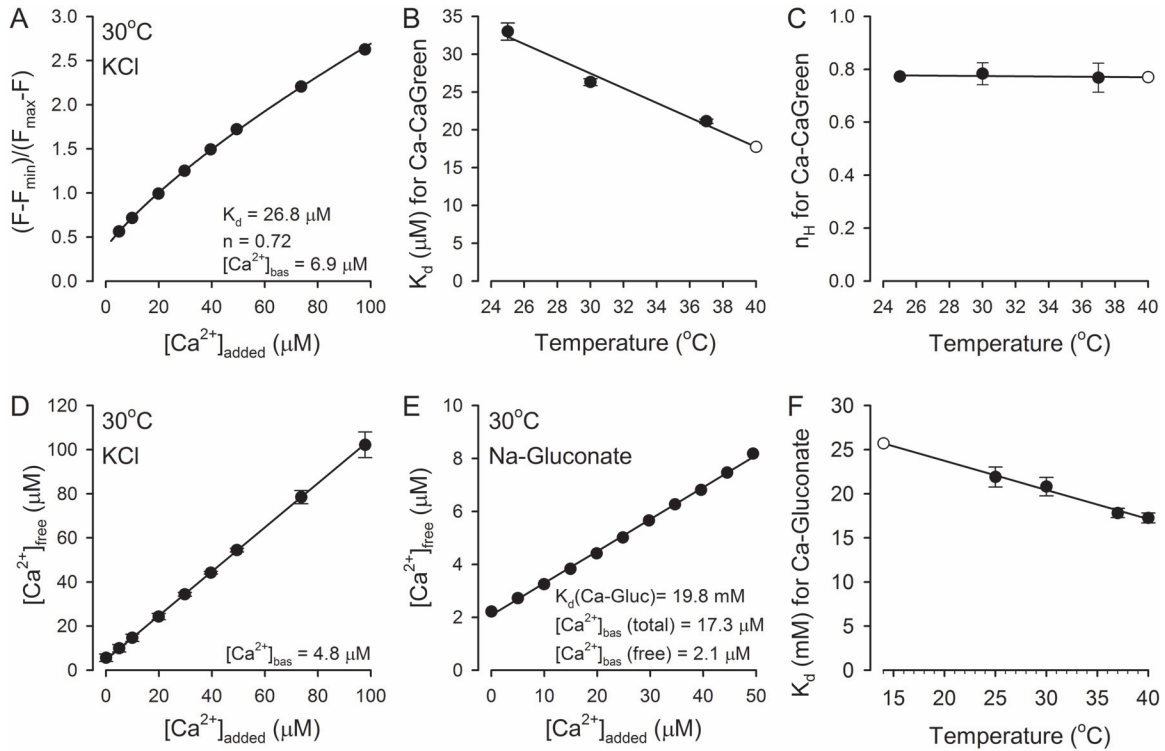

**Fig. S5. Temperature dependence of the dissociation constant of Ca-gluconate.** A, Calibration curve of the dye Ca-green-5N obtained by incremental addition of  $\text{CaCl}_2$  to a 140 mM KCl-based solution at 30°C (*black symbols*) and a fit of the plot to  $y=(x/K_d)^n$  (Materials and methods; *black curve*) to obtain the plotted dye parameters  $K_d$  and  $n$ . B, C, Temperature dependence of dye parameters (B)  $K_d$  and (C)  $n$  (*black symbols*), and linear regression fits (*black lines*). *Solid symbols* represent mean $\pm$ SEM,  $n=2-4$ . *Open symbols* represent extrapolated dye parameters at 40°C. D, Control  $[\text{Ca}^{2+}]_{\text{free}}$  prediction at 30°C, obtained by incremental addition of  $\text{CaCl}_2$  to a 140 mM KCl-based solution. *Black symbols* plot predicted free  $\text{Ca}^{2+}$  (mean $\pm$ SEM,  $n=4$ ) using the dye parameters from A, B; *black line* is a fit of the function  $y=x+[\text{Ca}^{2+}]_{\text{bas}}$ . E, Gluconate titration with  $\text{Ca}^{2+}$  at 30°C, obtained by incremental addition of  $\text{CaCl}_2$  to a 140 mM Na-gluconate based solution. *Black symbols* plot predicted free  $\text{Ca}^{2+}$  using the dye parameters from A, B; *black curve* is a fit of a simple binding equation (Materials and methods) yielding the plotted  $K_d$  of Ca-gluconate. F, Temperature dependence of the  $K_d$  of Ca-gluconate (*black symbols*) and linear regression fit (*black line*). *Solid symbols* represent mean $\pm$ SEM,  $n=2-4$ . *Open symbol* represents extrapolated  $K_d$  at 14°C. For all titrand solutions pH was adjusted to 7.1 at all studied temperatures.

**Table S1. Calculated free [Ca<sup>2+</sup>] in our Na-gluconate based bath solution with various amounts of added Ca-gluconate<sub>2</sub>, at the temperatures employed in this study.**

| T(°C) | [Ca <sup>2+</sup> ] <sub>added</sub> (μM) | [Ca <sup>2+</sup> ] <sub>free</sub> (μM) |
|-------|-------------------------------------------|------------------------------------------|
| 14    | 0                                         | 2.47                                     |
|       | 32                                        | 7.31                                     |
|       | 100                                       | 17.6                                     |
|       | 320                                       | 50.8                                     |
|       | 1000                                      | 153                                      |
|       | 3200                                      | 477                                      |
|       | 10000                                     | 1422                                     |
| 25    | 0                                         | 2.16                                     |
|       | 32                                        | 6.42                                     |
|       | 100                                       | 15.4                                     |
|       | 320                                       | 44.6                                     |
|       | 1000                                      | 134                                      |
|       | 3200                                      | 418                                      |
| 37    | 1000                                      | 113                                      |
| 40    | 0                                         | 1.73                                     |
|       | 10                                        | 2.79                                     |
|       | 32                                        | 5.13                                     |
|       | 100                                       | 12.4                                     |
|       | 1000                                      | 107                                      |



**Movie S1 (separate file).** Morphs created (USCF Chimera) by linear interpolation between the structures of (*Top left*) apo (6BPQ) vs. WS-12+PIP2-bound (6NR2) TRPM8 from *Ficedula albicollis*, (*Bottom left*) apo (6O6A) vs. Ca<sup>2+</sup>-bound (6O77) TRPM8 from *Parus major*, (*Top right*) apo (6PUO) vs. Ca<sup>2+</sup>+ADPR-bound (6PUS) human TRPM2, and (*Bottom right*) apo (6DRK) vs. Ca<sup>2+</sup>+ADPR-bound (6DRJ) TRPM2 from *Danio rerio*. Conserved TRPM domains are in *light pink*, the NUDT9H domains of the TRPM2 orthologs are in *pale cyan*. *Yellow lines* indicate approximate membrane boundaries.

## SI References

1. L. Csanády, B. Torocsik, Four Ca<sup>2+</sup> ions activate TRPM2 channels by binding in deep crevices near the pore but intracellularly of the gate. *J. Gen. Physiol* 133, 189-203 (2009).
2. B. Tóth, L. Csanády, Pore collapse underlies irreversible inactivation of TRPM2 cation channel currents. *Proc. Natl. Acad. Sci. U. S. A* 109, 13440-13445 (2012).
